# Supplementary material
Source: PubMed Central journal article supplement (PMC5885816)
Supplement: jamadermatol-154-336-s001.pdf [file jamadermatol-154-336-s001.pdf]

## Supplementary Online Content

Perez M, Donaldson M, Jain N, Robinson JK. Sun protection behaviors in Head Start and other early childhood education programs in Illinois. *JAMA Dermatol*. Published online January 24, 2018. doi:10.1001/jamadermatol.2017.5257

**eTable.** Respondent Sun Protection Themes

This supplementary material has been provided by the authors to give readers additional information about their work.

**eTable.** Respondent Sun Protection Themes

| Themes                                                                                 | No. of respondents  |                       |                    |
|----------------------------------------------------------------------------------------|---------------------|-----------------------|--------------------|
|                                                                                        | HS/EHS<br>(n = 102) | Day care<br>(n = 100) | Total<br>(n = 202) |
| Other sun safety measures are unimportant if children are using sunscreen              | 11 (10.8)           | 19 (19.0)             | 30 (14.9)          |
| Follow heat advisory policies to determine outdoor playtime                            | 46 (45.1)           | 68 (68.0)             | 114 (56.4)         |
| Require parents to provide sunscreen to accommodate for allergies and drug guidelines  | 21 (20.6)           | 45 (45.0)             | 66 (32.7)          |
| Children are not allowed to apply sunscreen themselves due to their young age          | 71 (69.6)           | 84 (84.0)             | 156 (77.2)         |
| Responders use spray sunscreen when applying to children to avoid unnecessary touching | 61 (59.8)           | 39 (39.0)             | 100 (50.0)         |
| Attire is determined by the parents                                                    | 46 (45.1)           | 44 (44.0)             | 90 (45.0)          |

Abbreviation: HS/EHS, Head Start and Early Head Start.
